# Supplementary material
Source: Springer Nature journal article supplement (https://www.springermedizin.de/resource/supplementary/12876_2011_638_MOESM5_ESM.pdf/9437150)

Control

GvHD

Occludin

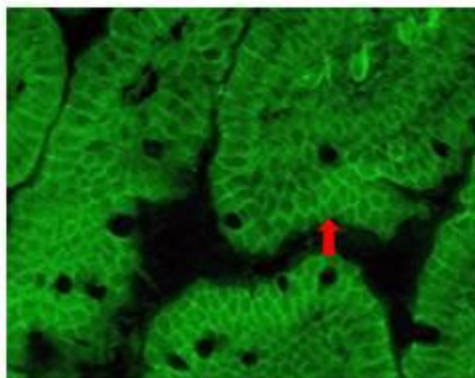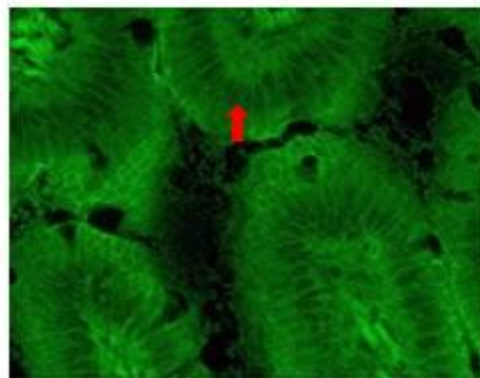

ZO-1

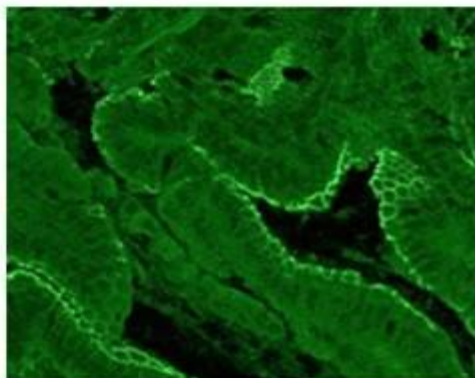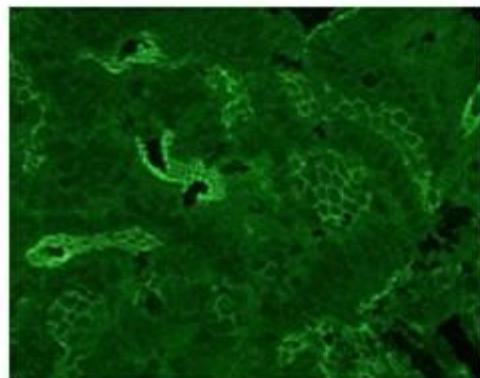

F-actin

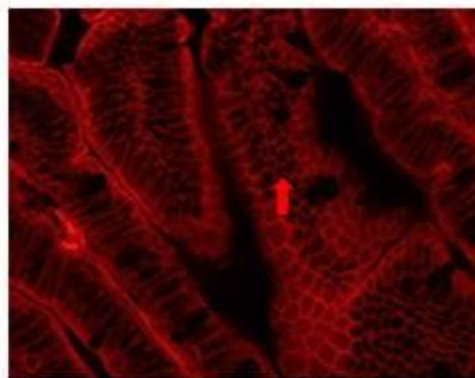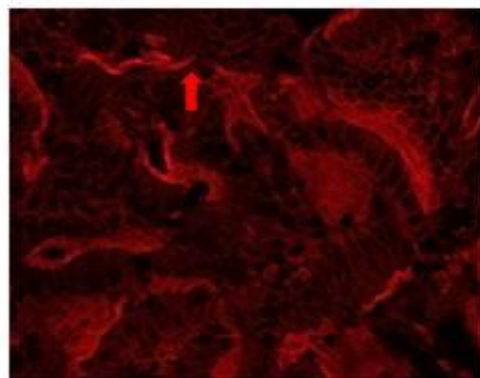

Supplement: MOESM5 [file 9437150]
